# Supplementary material
Source: PubMed Central journal article supplement (PMC2675629)

## Supplemental Figures

Figure S1. Short-term adhesion strength (spinning disk assay, 15 min) for FAK+ and FAK- cells in the presence and absence of serum showing no serum effects.

Figure S2. Immunostaining for activated  $\beta_1$  integrins using the 9EG7 antibody for cells adhesion to fibronectin at 15 min. FAK+ cells exhibited more and a wider spatial distribution of 9EG7-positive structures compared to FAK- cells.

Figure S3. Antibody binding histograms for conformation-sensitive (9EG7) and total integrin (MAB1997) antibodies for steady-state adhesion showing no differences in integrin activation between FAK+ and FAK- cells in long term adhesion.

Figure S4. Adhesion strengthening kinetic profiles for FAK-Y397 mutant.

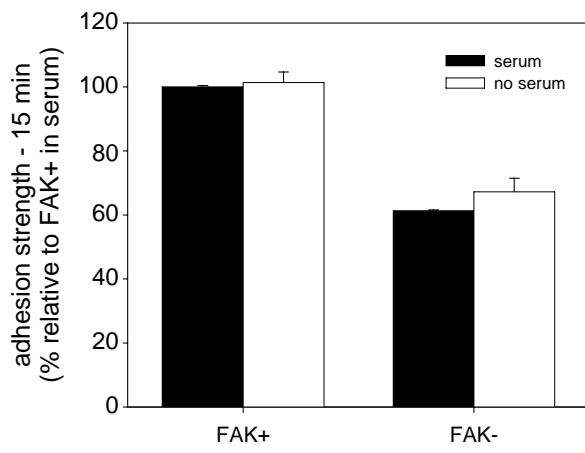

**FAK+**

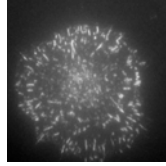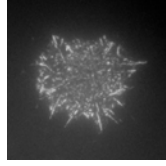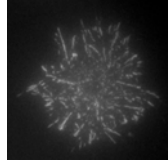

**FAK-**

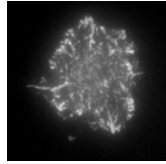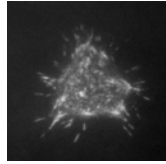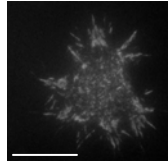

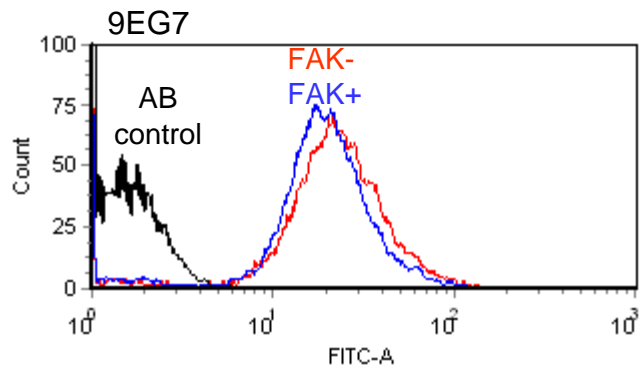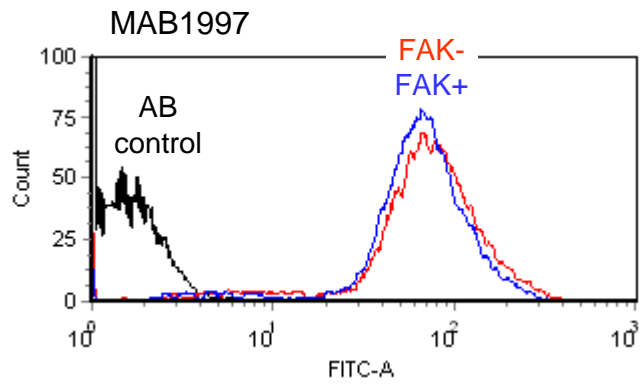

### FAK-Y397 mutant

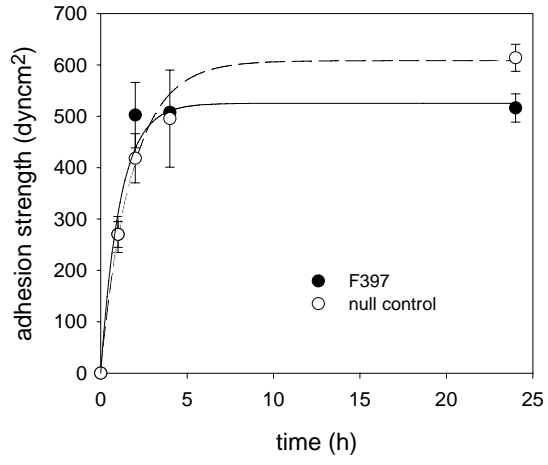

Supplement: E08-01-0076_1.pdf [file E08-01-0076_1.pdf]
